# Supplementary material for: Kinetics of anti-SARS-CoV-2 antibodies and hematological parameters in hospitalized pre-vaccination COVID-19 patients in Peru
Source: PeerJ. 2025 Aug 22;13:e19771. doi: 10.7717/peerj.19771 (PMC12377358; doi:10.7717/peerj.19771)
Supplement: Supplemental Information 1 — -: missing data [file peerj-13-19771-s001.xlsx]

## Sheet: Data
Sample	Aliq	Hospital admission date	Sample collection date	Gender	Age	Outcome	State	ICU	Mechanical ventilation	Corticosteroid treatment	Obesity	Diabetes	High blood pressure	Chronic kidney disease	Chronic lung disease	Cardiovascular disease	Gout	Other	Hemoglobin	Leukocytes	Segmented neutrophils	Lymphocytes	Absolute neutrophils	Absolute lymphocytes	Platelets	CRP	D-dimer	Ferritin	Creatinine	Prothrombin time	Activated Partial Thromboplastin Time	SpO2/FiO2	IgMS1	IgGS1	IgMRBD	IgGRBD
1	a	2020-07-28	2020-07-29	M	55	discharge	severe	No	No	Si	Si	No	No	No	No	No	No	No	14.5	6.92	81	13	5.6052	0.8996	338000	-	0.45	536.7	0.7	13.44	30.87	106.667	0.235	1.195	0.547	1.023
1	b	2020-07-28	2020-07-30	M	55	discharge	severe	No	No	Si	Si	No	No	No	No	No	No	No	12.9	6.85	80	16	5.48	1.096	365000	86.7	0.26	678.8	0.71	12.17	28.79	138.571	0.316	1.669	0.583	1.35
2	a	2020-07-28	2020-07-29	M	60	discharge	severe	No	No	Si	No	No	Si	No	No	No	No	No	15.3	20.45	93	2	19.223	0.409	347000	61.3	0.45	1482.2	0.8	10.74	28.16	106.667	0.039	0.377	0.08	0.408
2	b	2020-07-28	2020-07-30	M	60	discharge	severe	No	No	Si	No	No	Si	No	No	No	No	No	13.5	17.68	90	2	16.6192	0.3536	306000	27.1	0.41	1285.7	0.8	11.91	30.27	105.556	0.054	0.773	0.102	0.757
2	d	2020-07-28	2020-07-31	M	60	discharge	severe	No	No	Si	No	No	Si	No	No	No	No	No	13.5	17.68	90	2	16.6192	0.3536	306000	27.1	0.41	1285.7	0.8	11.91	30.27	105.556	0.0955	0.5735	0.207	0.8395
2	e	2020-07-28	2020-08-03	M	60	discharge	severe	No	No	Si	No	No	Si	No	No	No	No	No	12.6	18.71	87	7	16.4648	1.3097	447000	27.2	0.68	1442.7	0.92	11.24	27.47	126.316	0.064	1.531	0.117	1.315
2	f	2020-07-28	2020-08-06	M	60	discharge	severe	No	No	Si	No	No	Si	No	No	No	No	No	13.7	13.94	81	11	11.2914	1.5334	464000	26.7	0.55	1324.8	0.81	11.48	32.73	200	0.074	1.772	0.129	1.437
2	g	2020-07-28	2020-08-10	M	60	discharge	severe	No	No	Si	No	No	Si	No	No	No	No	No	13.1	11.17	69	21	7.7073	2.3457	400000	3.2	0.31	948.3	0.82	11.14	35.52	242.5	0.066	2.118	0.138	1.785
3	a	2020-07-30	2020-07-31	M	32	discharge	severe	No	No	Si	No	No	No	No	No	No	No	No	14.6	5.28	74	20	3.96	1.056	373000	31.8	0.61	517.8	0.53	11.17	27.94	170.909	0.051	0.36	0.128	0.337
3	b	2020-07-30	2020-08-01	M	32	discharge	severe	No	No	Si	No	No	No	No	No	No	No	No	15.4	6.02	79	12	4.7558	0.7224	440000	17.9	0.51	543.1	0.67	10.62	28.82	211.111	0.044	0.562	0.121	0.456
3	c	2020-07-30	2020-08-03	M	32	discharge	severe	No	No	Si	No	No	No	No	No	No	No	No	15.4	5.24	84	10	4.4016	0.524	208000	6.1	-	522.5	0.66	10.59	29.42	210.87	0.05	0.849	0.121	0.593
4	a	2020-07-25	2020-07-25	M	55	death	severe	Si	Si	Si	Si	No	No	No	No	No	No	No	15	8.24	84	9	7.3336	0.7416	219000	198.9	0.45	896.2	0.5	12.25	38.85	102.222	0.039	0.397	0.08	0.361
4	c	2020-07-25	2020-07-29	M	55	death	severe	Si	Si	Si	Si	No	No	No	No	No	No	No	13.6	10.23	89	6	9.207	0.6138	450000	311.5	4.6	1163.3	0.77	15.73	46.12	105.556	0.2025	0.9695	0.417	1.1335
4	d	2020-07-25	2020-07-30	M	55	death	severe	Si	Si	Si	Si	No	No	No	No	No	No	No	13.6	10.23	89	6	9.207	0.6138	450000	311.5	4.6	1163.3	0.77	15.73	46.12	105.556	0.494	1.082	0.644	1.503
5	a	2020-07-27	2020-07-27	M	46	death	severe	Si	Si	Si	Si	No	No	No	No	No	No	No	13.4	8.24	90	6	7.4984	0.4944	301000	3.5	0.45	311.3	0.8	12.32	39.72	98.8889	0.071	0.924	0.154	0.824
5	b	2020-07-27	2020-07-30	M	46	death	severe	Si	Si	Si	Si	No	No	No	No	No	No	No	12.7	11.38	82	12	9.4454	1.3656	300000	86.3	0.95	724.5	0.86	12.32	43.68	332.143	0.091	1.804	0.167	1.48
5	c	2020-07-27	2020-08-01	M	46	death	severe	Si	Si	Si	Si	No	No	No	No	No	No	No	12.4	10.17	93	6	9.4581	0.6102	268000	303.3	1.58	1341.8	0.7	12.98	53.76	106.667	0.084	2.002	0.143	1.564
5	d	2020-07-27	2020-08-03	M	46	death	severe	Si	Si	Si	Si	No	No	No	No	No	No	No	10.8	7.38	90	6	6.642	0.4428	210000	171.3	1.11	1401.7	0.78	10.37	40.28	158.333	0.075	2.267	0.132	1.61
5	e	2020-07-27	2020-08-10	M	46	death	severe	Si	Si	Si	Si	No	No	No	No	No	No	No	12	6.85	87	10	5.9595	0.685	199000	31.4	1.01	938.3	0.68	10.97	40.47	134.286	0.117	2.354	0.12	1.842
5	f	2020-07-27	2020-08-13	M	46	death	severe	Si	Si	Si	Si	No	No	No	No	No	No	No	11.1	7.18	79	13	5.744	0.9334	232000	116.8	-	1611.7	0.69	10.8	40.09	158.333	0.129	2.355	0.112	1.733
5	g	2020-07-27	2020-08-20	M	46	death	severe	Si	Si	Si	Si	No	No	No	No	No	No	No	10.1	11.08	87	10	9.6396	1.108	195000	291.3	4.6	1410.5	1.32	11.31	53.43	105.556	0.132	2.355	0.084	1.861
6	b	2020-07-27	2020-07-29	M	28	discharge	severe	No	No	No	Si	No	No	No	No	No	No	No	14.3	19.36	86	6	17.424	1.1616	506000	54.9	0.52	620.4	0.79	10.96	27	167.857	0.341	0.850667	0.627333	0.693667
6	d	2020-07-27	2020-08-03	M	28	discharge	severe	No	No	No	Si	No	No	No	No	No	No	No	15.9	14.42	92	5	13.4106	0.721	370000	13.6	0.85	613.3	0.82	11.93	31.26	261.111	0.463	1.906	0.747	1.492
6	e	2020-07-27	2020-08-06	M	28	discharge	severe	No	No	No	Si	No	No	No	No	No	No	No	15.2	12.11	74	15	8.9614	1.8165	293000	4.8	4.6	460.5	0.53	12.59	27	237.5	0.587	2.21	0.724	1.422
6	f	2020-07-27	2020-08-11	M	28	discharge	severe	No	No	No	Si	No	No	No	No	No	No	No	14.5	6.81	68	22	4.6308	1.4982	-	5.4	-	-	0.54	-	-	342.857	0.414	2.179	0.663	1.796
6	g	2020-07-27	2020-08-13	M	28	discharge	severe	No	No	No	Si	No	No	No	No	No	No	No	15.3	7.42	66	24	4.8972	1.7808	297000	5.7	1.14	458.1	0.55	11.46	34.05	296.875	0.368	2.267	0.587	1.84
7	a	2020-07-28	2020-07-29	M	35	death	severe	Si	Si	Si	Si	Si	No	No	No	No	No	No	15.6	17.1	93	2	16.245	0.342	-	157.7	-	511.9	0.67	-	-	263.889	0.0515	0.3585	0.132	0.394
7	d	2020-07-28	2020-07-30	M	35	death	severe	Si	Si	Si	Si	Si	No	No	No	No	No	No	14.7	11.5	90	5	10.695	0.575	-	80.3	-	575	0.74	-	-	313.333	0.04	0.259	0.172	0.797
7	e	2020-07-28	2020-07-31	M	35	death	severe	Si	Si	Si	Si	Si	No	No	No	No	No	No	14.7	22.56	91	3	21.6576	0.6768	335000	132.8	1.03	888.7	0.92	11.51	29.2	247.5	0.098	1.302	0.233	1.112
7	f	2020-07-28	2020-08-01	M	35	death	severe	Si	Si	Si	Si	Si	No	No	No	No	No	No	13.9	14.15	95	2	13.867	0.283	291000	121.1	0.51	800.4	0.8	10.91	29.36	274.286	0.107	1.461	0.269	1.11
7	g	2020-07-28	2020-08-10	M	35	death	severe	Si	Si	Si	Si	Si	No	No	No	No	No	No	12.5	12.39	86	7	11.151	0.8673	-	208.9	-	765.4	0.76	-	-	245	0.068	1.687	0.128	1.392
7	h	2020-07-28	2020-08-15	M	35	death	severe	Si	Si	Si	Si	Si	No	No	No	No	No	No	10.9	9.9	79	14	7.92	1.386	397000	230.9	4.6	678.4	0.53	11.01	30.15	180	0.061	1.414	0.109	1.27
8	a	2020-07-28	2020-07-29	M	62	death	severe	No	No	Si	Si	No	No	No	No	No	No	No	15.5	12.39	88	6	11.151	0.7434	306000	87.1	-	1317.4	0.6	10.71	34.47	103.333	0.1285	0.5985	0.2165	0.538
8	c	2020-07-28	2020-07-31	M	62	death	severe	No	No	Si	Si	No	No	No	No	No	No	No	12.7	15.77	92	2	15.1392	0.3154	251000	327.8	4.6	1318.1	0.67	11.24	43.56	85	0.485	1.688	0.551	1.256
8	d	2020-07-28	2020-08-01	M	62	death	severe	No	No	Si	Si	No	No	No	No	No	No	No	14	17.79	90	4	16.5447	0.7116	374000	311.5	3.82	1352.5	0.77	11.19	44.62	211.111	0.432	1.815	0.654	1.474
9	a	2020-07-30	2020-07-31	M	67	death	severe	Si	Si	Si	Si	No	No	No	No	No	No	No	11.6	10.38	87	5	9.2382	0.519	262000	183	2.31	1212	0.85	11.01	28.02	114.118	0.052	0.414	0.091	0.622
9	c	2020-07-30	2020-08-03	M	67	death	severe	Si	Si	Si	Si	No	No	No	No	No	No	No	12.5	18.88	92	3	18.1248	0.5664	195000	304.4	3.61	1453.6	0.6	11.98	31.88	165.455	0.079	1.447	0.137	1.209
9	d	2020-07-30	2020-08-06	M	67	death	severe	Si	Si	Si	Si	No	No	No	No	No	No	No	11.5	10.33	90	6	9.4003	0.6198	324000	83.4	3.59	552.8	0.68	10.61	27	260	0.082	1.627	0.126	1.196
10	a	2020-08-03	2020-08-04	M	61	discharge	severe	Si	Si	Si	No	No	No	No	No	No	No	Polycythemia	-	-	-	-	-	-	-	-	-	494.8	-	-	-	165	0.041	1.018	0.084	0.326
10	b	2020-08-03	2020-08-05	M	61	discharge	severe	Si	Si	Si	No	No	No	No	No	No	No	Polycythemia	19.3	18.23	92	2	17.5008	0.3646	214000	320.6	4.6	1192.8	1.48	14	37.9	97.8947	0.051	0.698	0.108	0.166
10	c	2020-08-03	2020-08-06	M	61	discharge	severe	Si	Si	Si	No	No	No	No	No	No	No	Polycythemia	18.3	14.51	94	3	13.6394	0.4353	252000	211	2.09	1002	3.33	11.57	34.83	213.333	0.071	0.35	0.178	0.195
10	d	2020-08-03	2020-08-08	M	61	discharge	severe	Si	Si	Si	No	No	No	No	No	No	No	Polycythemia	18.7	7.02	89	7	6.2478	0.4914	244000	45.6	-	774	4.54	-	33.3	240	0.179	1.3205	0.3405	0.744
10	f	2020-08-03	2020-08-10	M	61	discharge	severe	Si	Si	Si	No	No	No	No	No	No	No	Polycythemia	18.6	7.96	87	9	6.9252	0.7164	206000	56.3	3.74	812.8	4.88	11.99	35.28	213.333	0.184	2.03	0.399	1.352
10	h	2020-08-03	2020-08-20	M	61	discharge	severe	Si	Si	Si	No	No	No	No	No	No	No	Polycythemia	16	6.59	85	10	5.6674	0.659	226000	90.9	2.73	1213.5	4.34	11.2	36.58	274	0.097	2.765	0.205	1.942
10	i	2020-08-03	2020-08-22	M	61	discharge	severe	Si	Si	Si	No	No	No	No	No	No	No	Polycythemia	14.2	6.9	78	10	5.796	0.69	164000	46.3	2.58	-	3.6	10.97	34.28	91.5	0.093	2.494	0.178	1.991
10	j	2020-08-03	2020-08-24	M	61	discharge	severe	Si	Si	Si	No	No	No	No	No	No	No	Polycythemia	14.9	11.3	76.3	11.4	8.8479	1.2882	154000	66.8	4.6	1440.4	1.82	11.43	30.75	192	0.085	2.875	0.167	2
11	b	2020-08-04	2020-08-05	M	64	discharge	severe	No	No	No	No	No	No	No	No	No	Si	No	15	10.39	86	10	8.9354	1.039	414000	54.4	0.63	847.8	0.67	12.56	28.13	106.667	0.1995	1.207	0.292	0.872
11	c	2020-08-04	2020-08-06	M	64	discharge	severe	No	No	No	No	No	No	No	No	No	Si	No	-	-	-	-	-	-	-	-	-	-	-	-	-	-	0.234	1.869	0.371	1.414
11	d	2020-08-04	2020-08-13	M	64	discharge	severe	No	No	No	No	No	No	No	No	No	Si	No	16.1	8.56	80	15	6.848	1.284	430000	21.4	0.39	967.6	0.55	13.34	37.95	240	0.176	2.317	0.297	1.89
11	e	2020-08-04	2020-08-17	M	64	discharge	severe	No	No	No	No	No	No	No	No	No	Si	No	15.1	6.32	71	20	4.4872	1.264	309000	45.6	0.49	491.8	0.5	11.54	38.8	235	0.1335	2.6915	0.2245	2.1845
11	g	2020-08-04	2020-08-25	M	64	discharge	severe	No	No	No	No	No	No	No	No	No	Si	No	14.5	5.84	70	22	4.088	1.2848	271000	47.1	0.62	302.3	0.5	11.11	37.98	447.619	0.073	2.891	0.127	2.133
12	a	2020-07-30	2020-07-30	M	56	discharge	severe	No	No	Si	Si	No	No	No	No	No	No	No	15.2	20.71	81	8	17.6035	1.6568	328000	-	-	1899.7	0.7	11.8	30.5	102.222	0.058	0.318	0.105	0.372
12	b	2020-07-30	2020-08-05	M	56	discharge	severe	No	No	Si	Si	No	No	No	No	No	No	No	14.8	19.65	87	8	17.0955	1.572	516000	54.2	0.56	737.2	0.87	12.67	31.02	106.667	0.082	0.464	0.149	0.582
12	c	2020-07-30	2020-08-10	M	56	discharge	severe	No	No	Si	Si	No	No	No	No	No	No	No	15.2	16.57	80	14	13.256	2.3198	579000	13.6	0.39	622.6	0.94	13.66	30.91	232.5	0.182	1.569	0.281	1.383
13	a	2020-08-03	2020-08-04	M	44	discharge	severe	No	No	Si	No	No	No	No	No	No	No	No	13	9.39	83	9	7.8876	0.8451	480000	65.7	1.25	1197.3	0.75	11.52	28.2	102.222	0.189	1.5655	0.228	1.303
13	c	2020-08-03	2020-08-05	M	44	discharge	severe	No	No	Si	No	No	No	No	No	No	No	No	-	-	-	-	-	-	-	-	-	-	-	-	-	-	0.199	2.162	0.226	1.659
13	d	2020-08-03	2020-08-10	M	44	discharge	severe	No	No	Si	No	No	No	No	No	No	No	No	12.6	16.13	85	6	13.7105	0.9678	450000	37.2	0.21	447.5	0.8	12.04	31.07	215.556	0.178	2.411	0.218	1.676
13	e	2020-08-03	2020-08-14	M	44	discharge	severe	No	No	Si	No	No	No	No	No	No	No	No	14.3	7.41	66	26	4.8906	1.9266	383000	2.7	-	402	0.74	12.73	28.24	342.857	0.208	2.566	0.303	1.97
14	a	2020-07-30	2020-08-03	F	66	death	severe	No	No	Si	No	No	No	No	No	No	No	No	13.6	6.27	89	7	5.5803	0.4389	272000	76.1	0.68	1261.1	0.42	14.18	27.37	134.286	0.078	1.676	0.165	0.952
14	b	2020-07-30	2020-08-06	F	66	death	severe	No	No	Si	No	No	No	No	No	No	No	No	13.4	13.55	92	3	12.737	0.4065	269000	140.5	1.74	1362.2	0.37	14.7	30.68	98.913	0.105	2.188	0.178	1.671
15	a	2020-07-30	2020-07-30	M	68	discharge	severe	No	No	Si	No	No	Si	No	No	No	No	No	13.8	7.24	85	9	6.154	0.6516	217000	18.2	-	203.6	-	-	-	185.714	0.054	0.137	0.118	0.2
15	b	2020-07-30	2020-08-06	M	68	discharge	severe	No	No	Si	No	No	Si	No	No	No	No	No	13.5	8.88	88	8	7.8144	0.7104	330000	31.3	0.45	398.3	0.84	11.2	27	261.111	0.107	0.451	0.224	0.485
15	c	2020-07-30	2020-08-10	M	68	discharge	severe	No	No	Si	No	No	Si	No	No	No	No	No	14	6.04	82	12	4.9528	0.7248	428000	-	0.49	587.3	0.81	11.44	32.38	232.5	0.198	1.943	0.381	1.511
15	e	2020-07-30	2020-08-18	M	68	discharge	severe	No	No	Si	No	No	Si	No	No	No	No	No	14	6.01	79	14	4.7479	0.8414	447000	45.7	1.78	671.3	0.8	-	-	240	0.24	2.663	0.37	2.197
15	f	2020-07-30	2020-08-25	M	68	discharge	severe	No	No	Si	No	No	Si	No	No	No	No	No	13.3	5.15	65	25	3.3475	1.2875	562000	128.1	0.77	475.1	0.8	10.95	43.35	300	0.18	2.688	0.259	2.274
15	g	2020-07-30	2020-09-02	M	68	discharge	severe	No	No	Si	No	No	Si	No	No	No	No	No	13.4	5.89	61	32	3.6518	1.8848	563000	-	-	379.9	1	11.46	32.71	452.381	0.148	2.541	0.224	2.189
16	a	2020-07-30	2020-07-31	M	56	discharge	severe	No	No	Si	No	No	No	No	No	No	No	No	14.7	12.73	84	8	10.9478	1.0184	351000	90	-	927.7	-	10.77	32.22	140	0.057	0.131	0.107	0.131
16	b	2020-07-30	2020-08-06	M	56	discharge	severe	No	No	Si	No	No	No	No	No	No	No	No	13.5	11.98	89	5	10.6622	0.599	524000	188.6	1.13	751.8	0.74	13.36	33.75	95.6989	0.178	1.355	0.389	1.024
16	c	2020-07-30	2020-08-10	M	56	discharge	severe	No	No	Si	No	No	No	No	No	No	No	No	15.1	11.26	83	10	9.3458	1.126	-	25	-	860.3	0.82	-	-	288.235	0.326	2.054	0.629	1.735
16	d	2020-07-30	2020-08-13	M	56	discharge	severe	No	No	Si	No	No	No	No	No	No	No	No	15.8	8.25	75	17	6.1875	1.4025	692000	7.9	0.73	608.8	0.86	12.29	34.37	245	0.373	2.412	0.522	1.82
16	e	2020-07-30	2020-08-17	M	56	discharge	severe	No	No	Si	No	No	No	No	No	No	No	No	14.3	8.35	79	11	6.5965	0.9185	480000	25.5	0.78	383.4	0.8	10.96	33.03	346.429	0.229	2.395	0.345	1.823
17	a	2020-08-03	2020-08-04	F	65	death	severe	Si	Si	Si	Si	No	Si	No	No	No	No	No	12.7	32.33	87	3	29.097	0.9699	450000	28.6	1.99	859.5	1.21	13.15	34.58	44.4444	0.193	0.721	1.04	0.886
17	b	2020-08-03	2020-08-06	F	65	death	severe	Si	Si	Si	Si	No	Si	No	No	No	No	No	12.6	31.37	95	3	29.8015	0.9411	268000	157.1	2.56	2114	3.75	11.89	44.48	152.308	0.162	0.758	0.369	1.268
18	a	2020-07-31	2020-08-01	M	41	death	severe	Si	Si	Si	Si	No	No	No	No	No	No	No	13.2	-	87	7	-	-	388000	4	0.2	1697.5	0.6	11.39	31.97	240	0.123	0.269	0.182	0.292
18	b	2020-07-31	2020-08-03	M	41	death	severe	Si	Si	Si	Si	No	No	No	No	No	No	No	11.4	15.77	79	13	12.616	2.0501	388000	-	-	1617.2	0.62	-	-	196	0.331	1.19	0.42	0.813
18	c	2020-07-31	2020-08-06	M	41	death	severe	Si	Si	Si	Si	No	No	No	No	No	No	No	12.1	26.59	88	4	23.6651	1.0636	-	-	-	1602.6	0.55	-	-	204.444	0.526	2.399	0.473	1.564
18	d	2020-07-31	2020-08-10	M	41	death	severe	Si	Si	Si	Si	No	No	No	No	No	No	No	11.2	16.72	92	5	15.3824	0.836	267000	-	0.53	1098.8	0.48	11.54	33.19	196	0.542	2.562	0.377	2.503
18	e	2020-07-31	2020-08-17	M	41	death	severe	Si	Si	Si	Si	No	No	No	No	No	No	No	11.3	13.35	77.9	16	10.3996	2.136	-	-	-	780.4	0.42	-	-	194	0.568	2.635	0.253	2.623
18	f	2020-07-31	2020-08-20	M	41	death	severe	Si	Si	Si	Si	No	No	No	No	No	No	No	11.5	12.12	69	19	8.3628	2.3028	-	-	-	567.7	0.4	-	-	206	0.501	2.571	0.211	2.48
18	g	2020-07-31	2020-08-24	M	41	death	severe	Si	Si	Si	Si	No	No	No	No	No	No	No	9.6	11.05	78	9	8.84	0.9945	-	-	-	783.7	0.32	-	-	140	0.127	1.727	0.153	2.627
19	a	2020-08-01	2020-08-03	M	55	discharge	severe	No	No	Si	No	No	No	No	No	No	No	No	-	-	-	-	-	-	-	-	0.48	667.4	-	-	-	105.556	0.107	0.309	0.083	0.195
19	b	2020-08-01	2020-08-04	M	55	discharge	severe	No	No	Si	No	No	No	No	No	No	No	No	-	-	-	-	-	-	-	-	-	-	-	-	-	-	0.141	0.153	0.1	0.166
19	c	2020-08-01	2020-08-06	M	55	discharge	severe	No	No	Si	No	No	No	No	No	No	No	No	12.7	8.84	74	18	6.63	1.5912	278000	294.9	0.46	1895.7	0.66	10.77	31.97	143.284	0.234	0.416	0.244	0.418
19	d	2020-08-01	2020-08-10	M	55	discharge	severe	No	No	Si	No	No	No	No	No	No	No	No	12.4	8.38	77.9	15.8	6.52802	1.32404	407000	112	0.61	1035.2	0.78	11.49	30.55	156.667	0.568	2.409	0.325	2.068
20	a	2020-07-30	2020-08-03	M	75	death	severe	Si	Si	Si	No	No	Si	No	No	Si	No	No	11.3	5.89	79	14	4.6531	0.8246	224000	89.3	0.57	562.6	0.96	11.16	35.78	102.151	0.327	0.457	0.151	0.746
20	b	2020-07-30	2020-08-10	M	75	death	severe	Si	Si	Si	No	No	Si	No	No	Si	No	No	11.7	12.02	92	4	11.1786	0.4808	-	126.7	-	850.3	5.4	-	-	131.429	0.679	2.229	0.284	1.98
20	c	2020-07-30	2020-08-13	M	75	death	severe	Si	Si	Si	No	No	Si	No	No	Si	No	No	11.8	13.73	92	5	12.6316	0.6865	319000	151.8	-	690.1	3.91	-	-	101	0.66	3.015	0.268	2.196
21	a	2020-07-24	2020-08-03	M	55	death	severe	Si	Si	Si	No	No	Si	No	No	No	No	No	14.7	16.41	95	3	15.5895	0.4923	631000	293.4	1.1	1412.8	1.08	12.07	32.5	92.4731	0.231	2.5	0.539	3.052
21	b	2020-07-24	2020-08-08	M	55	death	severe	Si	Si	Si	No	No	Si	No	No	No	No	No	11.7	17.31	92	4	15.9252	0.6924	448000	126.8	4.6	1650	6.73	12.17	42.69	170	0.16	2.998	0.297	2.454
22	a	2020-08-02	2020-08-03	M	45	discharge	severe	No	No	Si	No	Si	No	No	No	No	No	No	17.6	4.35	70	25	3.045	1.0875	152000	91.4	-	224.9	0.71	13.57	50.98	242.5	0.047	0.276	0.082	0.588
22	b	2020-08-02	2020-08-07	M	45	discharge	severe	No	No	Si	No	Si	No	No	No	No	No	No	18.3	13.57	85	7	12.4844	0.9499	187000	265	0.41	1222.2	0.71	12.22	54.65	235	0.044	0.242	0.077	0.236
22	c	2020-08-02	2020-08-10	M	45	discharge	severe	No	No	Si	No	Si	No	No	No	No	No	No	17	5.62	88	10	4.9456	0.562	434000	210.3	0.53	1896.4	0.59	12.57	46.01	188	0.119	1.223	0.159	0.928
23	a	2020-07-25	2020-08-01	M	30	discharge	severe	No	No	Si	No	No	No	No	No	No	No	No	14.6	11.95	59	7	7.2895	0.8365	830000	16.7	0.74	934.5	0.79	11	28.34	306.25	0.12	1.774	0.139	1.792
23	b	2020-07-25	2020-08-04	M	30	discharge	severe	No	No	Si	No	No	No	No	No	No	No	No	13.5	12.66	79	11	10.2546	1.3926	700000	14.9	0.83	687.3	0.68	11.12	28.65	471.429	0.209	2.463	0.16	2.263
24	a	2020-07-31	2020-08-03	F	44	discharge	severe	No	No	Si	No	No	No	No	No	No	No	No	12.8	8.85	82	14	7.3455	1.239	543000	23	0.8	341.7	0.6	10.98	30.67	457.143	0.536	2.543	0.638	2.221
24	b	2020-07-31	2020-08-07	F	44	discharge	severe	No	No	Si	No	No	No	No	No	No	No	No	12.1	1.23	52	20	0.6519	0.246	-	29.7	-	327	0.62	10.95	-	161.667	0.2	2.916	0.695	2.663
24	c	2020-07-31	2020-08-11	F	44	discharge	severe	No	No	Si	No	No	No	No	No	No	No	No	12.1	8.81	83	11	7.3123	0.9691	683000	8.4	0.68	-	-	10.92	27	339.286	0.14	2.999	0.466	2.512
26	a	2020-08-05	2020-08-07	M	69	discharge	moderate	No	No	Si	No	No	Si	No	No	No	No	No	13.5	14.2	91	5	12.922	0.71	337000	94	1.4	1433.1	0.94	11.73	30.96	128	0.157	1.982	0.2	1.464
26	a	2020-08-05	2020-08-09	M	69	discharge	moderate	No	No	Si	No	No	Si	No	No	No	No	No	-	-	-	-	-	-	-	-	-	-	-	-	-	-	0.235	1.834	0.253	2.465
26	b	2020-08-05	2020-08-20	M	69	discharge	moderate	No	No	Si	No	No	Si	No	No	No	No	No	14.6	10.78	85	9	9.163	0.9702	312000	27	0.4	788.5	0.88	10.92	33.38	237.5	0.276	3.446	0.296	2.917
26	c	2020-08-05	2020-08-24	M	69	discharge	moderate	No	No	Si	No	No	Si	No	No	No	No	No	13.3	6.99	80	11	5.592	0.7689	160000	50.6	0.4	561.9	0.79	11.95	42.69	242.5	0.226	3.141	0.129	2.89
26	d	2020-08-05	2020-08-31	M	69	discharge	moderate	No	No	Si	No	No	Si	No	No	No	No	No	12.8	4.68	75	17	3.6036	0.7956	285000	35.3	-	328.5	0.9	11.51	38.62	296.875	0.16	2.855	0.08	2.462
26	e	2020-08-05	2020-09-04	M	69	discharge	moderate	No	No	Si	No	No	Si	No	No	No	No	No	11.6	6.41	75	18	4.8075	1.1538	318000	-	-	305.1	0.9	11.7	36.4	303.125	0.098	2.83	0.153	2.505
26	f	2020-08-05	2020-09-07	M	69	discharge	moderate	No	No	Si	No	No	Si	No	No	No	No	No	13.7	6.33	72.9	19.2	4.61457	1.21536	309000		-	286.2	0.9	11.64	42.56	457.143	0.111	3.283	0.145	3.052
27	c	2020-08-05	2020-08-07	F	53	discharge	moderate	No	No	No	No	No	No	No	No	No	No	No	15.1	5.07	47	42.4	2.3829	2.14968	300000	61.8	0.68	564.9	0.59	11.03	32.85	122.5	0.06	0.704	0.085	0.582
27	a	2020-08-05	2020-08-10	F	53	discharge	moderate	No	No	No	No	No	No	No	No	No	No	No	13.9	8.51	56	39	4.7656	3.3189	382000	3	0.16	555.9	0.73	11.29	33.18	137.143	0.065	1.545	0.129	1.487
27	b	2020-08-05	2020-08-13	F	53	discharge	moderate	No	No	No	No	No	No	No	No	No	No	No	14.8	8.06	50	46	4.03	3.7076	420000	0.9	0.28	551.2	0.66	12.47	38.3	237.5	0.07	2.612	0.178	1.914
29	a	2020-08-05	2020-08-06	M	31	discharge	moderate	No	No	Si	No	No	No	No	No	No	No	No	13.9	8.05	64	31	5.152	2.4955	558000	20.4	-	803.6	0.7	10.21	27	98	0.262	1.709	0.251	1.66
29	b	2020-08-05	2020-08-08	M	31	discharge	moderate	No	No	Si	No	No	No	No	No	No	No	No	-	-	-	-	-	-	-	-	-	581.1	-	-	-	242.5	0.378	2.512	0.295	2.207
29	c	2020-08-05	2020-08-10	M	31	discharge	moderate	No	No	Si	No	No	No	No	No	No	No	No	15	9.09	80	14	7.4538	1.2726	646000	10	-	757.5	0.7	9.8	27	466.667	0.092	0.196	0.091	0.269
30	a	2020-08-02	2020-08-10	M	38	death	severe	Si	Si	Si	Si	No	Si	No	Si	No	No	No	14	12.58	86	7	10.8188	0.8806	277000	179.7	3.46	1766.7	4.19	10.06	35.89	125.714	0.145	2.684	0.925	2.448
30	b	2020-08-02	2020-08-13	M	38	death	severe	Si	Si	Si	Si	No	Si	No	Si	No	No	No	14.4	11.66	89	6	10.3774	0.6996	327000	32	4.6	974.3	1.6	10.37	28.64	237.5	0.152	3.099	0.796	2.715
30	c	2020-08-02	2020-08-17	M	38	death	severe	Si	Si	Si	Si	No	Si	No	Si	No	No	No	12.9	14.66	86.3	6.4	12.6516	0.93824	271000	269.7	4.6	1906.8	1	11.21	38.26	268	0.141	3.273	0.483	2.81
30	d	2020-08-02	2020-08-20	M	38	death	severe	Si	Si	Si	Si	No	Si	No	Si	No	No	No	11.6	14.27	84	8	12.2722	1.1416	306000	414.7	4.6	2311.5	1.28	10.68	40.42	128	0.164	3.307	0.26	2.736
32	a	2020-07-30	2020-07-31	M	54	discharge	severe	No	No	Si	No	No	Si	Si	No	No	No	No	13	15.32	76	15	12.1028	2.298	406000	20.5	-	588.9	2.7	11.19	27	104.444	0.073	1.498	0.09	1.482
32	b	2020-07-30	2020-08-05	M	54	discharge	severe	No	No	Si	No	No	Si	Si	No	No	No	No	13.8	11.51	90	6	10.359	0.6906	506000	4	0.97	1420.3	1.66	11.54	27	442.857	0.129	2.898	0.118	2.197
33	a	2020-08-03	2020-08-04	M	66	discharge	severe	No	No	Si	No	No	No	No	No	No	No	No	-	-	-	-	-	-	-	-	0.49	1343.9	-	-	-	332.143	0.174	1.108	0.455	1.36
33	b	2020-08-03	2020-08-05	M	66	discharge	severe	No	No	Si	No	No	No	No	No	No	No	No	14.6	10.24	86	8	8.9088	0.8192	386000	114.4	0.73	1602.2	0.71	11.75	29.15	325	0.11	1.557	0.727	2.024
34	a	2020-08-11	2020-08-12	M	28	discharge	moderate	No	No	Si	No	No	No	No	No	No	No	No	15.4	15.33	95	3	14.8701	0.4599	342000	-	0.64	467	0.6	13.15	33.31	290.625	0.08	0.533	0.282	1.422
34	b	2020-08-11	2020-08-17	M	28	discharge	moderate	No	No	Si	No	No	No	No	No	No	No	No	15.8	6	80	16	5.76	0.96	572000	6.2	0.68	359.1	0.6	-	-	466.667	0.16	2.902	0.442	2.527
35	a	2020-08-15	2020-08-17	M	26	discharge	moderate	No	No	Si	No	No	No	No	No	No	No	No	16.2	18.47	94	4	17.3618	0.7388	212000	238	0.36	942.9	0.9	10.2	28.1	290.625	0.043	0.221	0.082	0.947
35	b	2020-08-15	2020-08-22	M	26	discharge	moderate	No	No	Si	No	No	No	No	No	No	No	No	15.1	5.37	75	21	4.0275	1.1277	328000	8.8	0.22	942	0.7	11.48	27	457.143	0.177	3.001	0.21	2.297
36	a	2020-08-14	2020-08-15	M	56	discharge	moderate	No	No	Si	No	No	No	No	No	No	No	No	15.5	13.07	83	6	12.2858	0.7842	232000	369.5	0.75	801.8	0.8	10.25	43.22	240	0.062	0.25	0.087	0.304
36	b	2020-08-14	2020-08-17	M	56	discharge	moderate	No	No	Si	No	No	No	No	No	No	No	No	15.5	8.26	81	6	7.434	0.4956	284000	70.3	0.73	575.4	0.9	-	-	269.444	0.172	0.85	0.169	1.064
36	c	2020-08-14	2020-08-19	M	56	discharge	moderate	No	No	Si	No	No	No	No	No	No	No	No	15.2	6.11	90	4	5.5601	0.2444	294000	70.5	1.27	594.4	1	12	37.08	242.5	0.304	2.216	0.357	1.971
37	a	2020-08-17	2020-08-18	M	47	discharge	severe	No	No	Si	No	No	No	No	No	No	No	Previous tuberculosis	14.6	5.08	85	8	4.572	0.4064	173000	80.3	1.06	1633.6	0.7	11.14	40.01	245	0.081	0.194	0.086	0.419
37	b	2020-08-17	2020-08-19	M	47	discharge	severe	No	No	Si	No	No	No	No	No	No	No	Previous tuberculosis	-	-	-	-	-	-	-	-	-	-	-	-	-	400	0.067	0.161	0.09	0.389
37	c	2020-08-17	2020-08-21	M	47	discharge	severe	No	No	Si	No	No	No	No	No	No	No	Previous tuberculosis	14.3	13.2	92	5	12.276	0.66	244000	52.2	0.4	1614.3	0.8	10.1	33.06	245	0.078	0.261	0.111	0.829
37	d	2020-08-17	2020-08-24	M	47	discharge	severe	No	No	Si	No	No	No	No	No	No	No	Previous tuberculosis	14.5	9.82	84	10	8.347	0.982	316000	144.6	0.6	2853.1	1	10.64	30.93	306.25	0.222	2.033	0.254	1.82
38	a	2020-08-19	2020-08-20	M	70	discharge	moderate	No	No	Si	No	No	No	No	No	No	No	No	13.7	12.06	92	4	11.3364	0.4824	389000	246.8	0.85	856.3	0.6	10.78	34.11	106.667	0.108	0.532	0.12	0.743
38	b	2020-08-19	2020-08-21	M	70	discharge	moderate	No	No	Si	No	No	No	No	No	No	No	No	14.1	11.64	88	6	10.3596	0.6984	548000	112.6	1.7	951.8	0.67	11.6	35.55	101.111	0.404	1.013	0.351	1.577
38	c	2020-08-19	2020-08-24	M	70	discharge	moderate	No	No	Si	No	No	No	No	No	No	No	No	14.3	15.58	94.4	2.3	-	-	580000	92.7	1.77	1416.5	0.52	11.43	35.46	108.889	0.598	2.948	0.413	2.392
54	a	2020-08-19	2020-08-19	M	64	discharge	moderate	No	No	Si	Si	No	No	No	No	No	No	No	12.4	8.5	85	7	7.565	0.595	464000	227	2.54	522.8	0.8	11.71	32.69	245	0.3	2.409	0.24	2.178
54	b	2020-08-19	2020-08-20	M	64	discharge	moderate	No	No	Si	Si	No	No	No	No	No	No	No	-	-	-	-	-	-	-	-	-	609.1	-	-	-	240	0.388	2.691	0.274	2.168
54	c	2020-08-19	2020-08-26	M	64	discharge	moderate	No	No	Si	Si	No	No	No	No	No	No	No	13.8	8.74	88	10	7.6912	0.874	677000	7.1	1.26	540.9	0.8	11.2	27	346.429	0.633	3.177	0.337	3.087
55	a	2020-08-30	2020-09-05	M	57	discharge	severe	No	No	Si	No	No	No	No	No	No	No	No	18	9.26	88	6	8.334	0.5556	292000	-	-	644.2	0.7	11.9	29.89	137.143	0.826	2.932	0.524	2.686
55	b	2020-08-30	2020-09-08	M	57	discharge	severe	No	No	Si	No	No	No	No	No	No	No	No	16.1	12.09	85	9	10.3974	1.0881	278000	-	-	675.6	0.7	11.99	30.56	240	0.641	3.049	0.408	2.961
55	c	2020-08-30	2020-09-11	M	57	discharge	severe	No	No	Si	No	No	No	No	No	No	No	No	17.8	6.88	63	28	4.3344	1.9264	314000	-	-	715.9	0.7	12.76	31.99	335.714	0.631	3.288	0.387	3.2
56	a	2020-08-26	2020-08-26	M	65	discharge	severe	No	No	Si	Si	No	Si	No	No	No	No	No	15.9	9	84	12	7.56	1.08	324000	234.5	0.93	1622.9	1.1	11.19	29.54	266.667	0.137	0.591	0.157	0.559
56	b	2020-08-26	2020-09-02	M	65	discharge	severe	No	No	Si	Si	No	Si	No	No	No	No	No	15.1	14.69	88	5	13.3679	0.7345	535000	-	-	1549	1.1	-	-	351.852	0.446	3.13	0.43	2.564
56	c	2020-08-26	2020-09-03	M	65	discharge	severe	No	No	Si	Si	No	Si	No	No	No	No	No	15.4	13.12	82	10	11.0208	1.312	469000	-	-	1217.7	0.9	10.85	27.08	461.905	0.571	2.986	0.487	2.775
57	a	2020-08-26	2020-08-26	M	73	discharge	moderate	No	No	No	No	No	No	No	No	No	No	No	14	6.93	74	21	5.1282	1.4553	246000	23.4	0.75	159.5	0.6	11.75	41.96	433.333	0.397	3.406	0.155	3.15
57	b	2020-08-26	2020-09-01	M	73	discharge	moderate	No	No	No	No	No	No	No	No	No	No	No	13.4	5.87	67	21	4.2264	1.2327	249000	-	-	191.2	0.6	11.6	39.41	300	0.211	3.267	0.101	2.816
57	c	2020-08-26	2020-09-09	M	73	discharge	moderate	No	No	No	No	No	No	No	No	No	No	No	14.4	6.04	59	29	3.6844	1.7516	246000	-	-	111.9	0.6	12.21	43.82	461.905	0.145	3.318	0.086	2.905
57	d	2020-08-26	2020-09-10	M	73	discharge	moderate	No	No	No	No	No	No	No	No	No	No	No	14.3	5.57	56	30	3.1192	1.671	249000	-	-	98.2	0.6	11.51	38.49	471.429	0.242	3.45	0.115	3.05
58	a	2020-08-30	2020-08-31	M	41	discharge	severe	No	No	Si	No	No	No	No	No	No	No	No	15.9	16.84	83	10	14.1456	1.684	544000	4.5	-	254.4	0.5	11.1	29.7	272.222	0.412	2.755	0.241	2.285
58	b	2020-08-30	2020-09-03	M	41	discharge	severe	No	No	Si	No	No	No	No	No	No	No	No	15.8	8.5	67	24	5.865	2.04	422000	-	-	432.7	0.7	10.5	30.05	461.905	0.31	2.706	0.246	2.424
59	a	2020-08-27	2020-08-28	M	63	discharge	severe	No	No	Si	Si	No	No	No	No	No	No	No	13.8	14.33	91	4	13.6135	0.5732	177000	83.7	0.54	2825.5	0.7	10.71	28.95	101.111	0.848	2.181	0.634	2.039
59	b	2020-08-27	2020-09-02	M	63	discharge	severe	No	No	Si	Si	No	No	No	No	No	No	No	14.1	6.94	82	10	5.8296	0.694	319000	38.2	0.48	1403.7	0.88	10.53	28.14	300	2.064	3.256	1.157	3.127
59	c	2020-08-27	2020-09-07	M	63	discharge	severe	No	No	Si	Si	No	No	No	No	No	No	No	14.1	10.63	83	9	9.2481	0.9567	450000	-	-	1559.2	0.8	11	30.5	466.667	2.072	3.028	1.048	2.802
60	a	2020-08-22	2020-08-28	M	58	discharge	severe	No	No	Si	No	No	No	No	No	No	No	No	14.3	8.43	80	15	6.744	1.2645	365000	52.6	4.3	1276.1	0.6	11.52	44.82	350	1.803	2.93	1.125	3.013
60	b	2020-08-22	2020-09-04	M	58	discharge	severe	No	No	Si	No	No	No	No	No	No	No	No	14.5	7.38	76	20	5.6088	1.476	314000	-	-	698.2	0.7	11.2	36.5	353.571	1.976	3.209	1.173	3.121
63	a	2020-08-25	2020-08-28	F	63	discharge	moderate	No	No	Si	Si	Si	Si	No	No	No	No	Parkinson's disease	11.9	5.29	80	16	4.232	0.8464	385000	52.4	0.51	513.6	0.42	11.54	32.84	237.5	0.488	2.247	0.415	2.004
63	b	2020-08-25	2020-08-31	F	63	discharge	moderate	No	No	Si	Si	Si	Si	No	No	No	No	Parkinson's disease	13.2	5.88	71.2	20.9	4.18656	1.22892	468000	50.3	0.84	398.5	0.43	11.99	34.33	314.286	0.575	3.092	0.455	2.662
63	c	2020-08-25	2020-09-01	F	63	discharge	moderate	No	No	Si	Si	Si	Si	No	No	No	No	Parkinson's disease	12.6	5.14	77	18	3.9578	0.9252	468000	24.7	1.26	341.2	0.45	11.43	34.87	240	0.781	3.409	0.467	2.923
64	a	2020-08-24	2020-08-25	M	58	discharge	severe	No	No	Si	No	No	Si	No	No	No	No	No	15.8	12.27	88	7	11.043	0.8589	306000	194.4	0.42	1450.2	0.8	11.2	31.82	266.667	1.374	1.802	0.879	1.244
64	b	2020-08-24	2020-08-28	M	58	discharge	severe	No	No	Si	No	No	Si	No	No	No	No	No	14.5	10.9	71	25	7.739	2.725	517000	14.3	1.83	987.5	0.8	11.24	27	342.857	2.03	2.943	1.302	2.238
